## ELEMENTARY AND GLOBAL ASPECTS OF CALCIUM SIGNALLING

MICHAEL J. BERRIDGE\*

*The Babraham Institute Laboratory of Molecular Signalling, PO Box 158, Cambridge CB2 3ES, UK*

### Summary

Calcium is a ubiquitous second messenger used to regulate a wide range of cellular processes. This role in signalling has to be conducted against the rigid homeostatic mechanisms that ensure that the resting level of  $\text{Ca}^{2+}$  is kept low (i.e. between 20 and 100  $\text{nmol l}^{-1}$ ) in order to avoid the cytotoxic effects of a prolonged elevation of  $[\text{Ca}^{2+}]$ . Cells have evolved a sophisticated signalling system based on the generation of brief pulses of  $\text{Ca}^{2+}$  which enables this ion to be used as a messenger, thus avoiding its toxic effects. Such  $\text{Ca}^{2+}$  spikes usually result from the coordinated

release of  $\text{Ca}^{2+}$  from internal stores using either inositol 1,4,5-trisphosphate or ryanodine receptors. Using  $\text{Ca}^{2+}$  imaging techniques, the opening of individual channels has now been visualized and models have been proposed to explain how these elementary events are coordinated to generate the global  $\text{Ca}^{2+}$  signals that regulate cellular activity.

Key words: calcium, inositol trisphosphate, ryanodine receptors, calcium-induced calcium release, sparks, puffs, waves.

### Introduction

The ubiquitous second messenger  $\text{Ca}^{2+}$  is responsible for regulating a wide range of cellular processes (Clapham, 1995). It is used at the beginning of life to mediate the process of fertilization and then is brought into play to regulate some of the cell cycle events during early development. As cells differentiate to perform specific functions,  $\text{Ca}^{2+}$  is once again called upon to regulate processes as diverse as muscle contraction, exocytosis, energy metabolism, chemotaxis and synaptic plasticity during learning and memory.  $\text{Ca}^{2+}$  is an unlikely candidate to perform this role of a universal messenger because prolonged elevations of  $[\text{Ca}^{2+}]$  result in irreversible damage as occurs during cardiac or cerebral ischaemia (Trump and Berezsky, 1995). Because of its cytotoxicity, the intracellular level of  $\text{Ca}^{2+}$  in resting cells is normally held within a narrow range of 20–100  $\text{nmol l}^{-1}$ . The signalling functions of  $\text{Ca}^{2+}$  have to be performed against this background of a tightly controlled  $\text{Ca}^{2+}$  homeostasis.

Another consequence of this rigid homeostatic control over  $\text{Ca}^{2+}$  is that this messenger has a very low diffusibility in cytoplasm. Distributed throughout the cytoplasm is an extensive array of  $\text{Ca}^{2+}$  pumps (Carafoli, 1994) which rapidly sequester  $\text{Ca}^{2+}$ , thus restricting its diffusion. In order to overcome the twin problems of an inherent cytotoxicity and low diffusibility, cells have evolved an ingenious mechanism of signalling based on presenting  $\text{Ca}^{2+}$  as brief spikes often organized as regenerative waves (Cheek, 1991; Berridge, 1993; Clapham, 1995). To understand this spatiotemporal organization of  $\text{Ca}^{2+}$  signalling, it is necessary to describe the properties of the  $\text{Ca}^{2+}$  channels that regulate the entry of  $\text{Ca}^{2+}$  into the cytoplasm.

### The structure and function of $\text{Ca}^{2+}$ channels

Cells have access to two sources of signal  $\text{Ca}^{2+}$ . First, it can enter from the outside ( $\text{Ca}_o^{2+}$ ).  $\text{Ca}^{2+}$  enters from the outside through a variety of channels such as the voltage-operated channels (VOCs), receptor-operated channels (ROCs) or store-operated channels (SOCs). Second, it can be released from internal stores ( $\text{Ca}_s^{2+}$ ) (Fig. 1). Which of these sources is used varies somewhat from cell to cell. In most cells, it is the internal stores which provide most of the signal  $\text{Ca}^{2+}$  so attention has focused on the intracellular  $\text{Ca}^{2+}$  channels, of which there are two main types (Berridge, 1993; Clapham, 1995). First, there is the ryanodine receptor (RYR) family comprising three members: RYR1 found in skeletal muscle and certain neurones (e.g. Purkinje cells), RYR2 found in cardiac muscle, brain and some other cells, and RYR3 found in smooth muscle, brain and other cells (Bennett *et al.* 1996; Giannini *et al.* 1995). Second, the inositol 1,4,5-trisphosphate receptor (InsP<sub>3</sub>R) family has a number of members (Furuichi and Mikoshiba, 1995; Taylor and Traynor, 1995; Bezprozvanny and Ehrlich, 1995). There are four InsP<sub>3</sub>R genes, and further diversity results from alternative splicing. These two receptor families must have evolved from a common ancestor since they display considerable sequence homology which is matched by a number of physiological similarities, particularly with regard to the control of channel opening (Taylor and Traynor, 1995).

Cytosolic  $\text{Ca}^{2+}$  homeostasis in resting cells is achieved by balancing the leak of  $\text{Ca}^{2+}$  (entering from the outside or from the stores) by the constant removal of  $\text{Ca}^{2+}$  using pumps either on the plasma membrane or on the internal stores (Fig. 1). These pumps ensure that cytoplasmic  $[\text{Ca}^{2+}]$  remains low and that the stores are loaded with signal  $\text{Ca}^{2+}$ . The brief burst of

\*e-mail: mjb38@cus.cam.ac.uk.

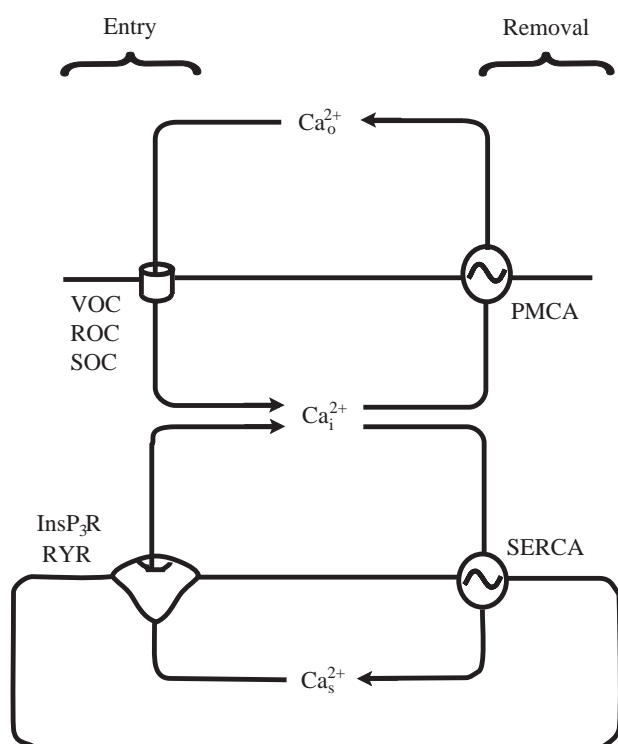

Fig. 1. Intracellular  $\text{Ca}^{2+}$  ( $\text{Ca}_i^{2+}$ ) homeostasis is achieved by balancing entry and removal of both external  $\text{Ca}^{2+}$  ( $\text{Ca}_o^{2+}$ ) and  $\text{Ca}^{2+}$  stored in the endoplasmic/sarcoplasmic reticulum ( $\text{Ca}_s^{2+}$ ). VOC, voltage-operated channel; ROC, receptor-operated channel; SOC, store-operated channel; PMCA, plasma membrane  $\text{Ca}^{2+}$ -ATPase; SERCA, sarco(endo)plasmic reticulum  $\text{Ca}^{2+}$ -ATPase;  $\text{InsP}_3\text{R}$ ,  $\text{InsP}_3$  receptor; RYR, ryanodine receptor.

$\text{Ca}^{2+}$  responsible for cell activation is usually produced by the coordinated opening of either the RYRs or the  $\text{InsP}_3\text{Rs}$ . Perhaps their most important property is their sensitivity to  $\text{Ca}^{2+}$ , i.e. they display the phenomenon of  $\text{Ca}^{2+}$ -induced  $\text{Ca}^{2+}$  release (CICR) which is of major significance for the generation of complex signals.  $\text{Ca}^{2+}$  has a biphasic effect on the RYRs and  $\text{InsP}_3\text{Rs}$ : as its concentration is increased, it initially exerts a positive feedback effect by enhancing the opening of the channels (i.e. CICR), but as soon as the concentration reaches a certain level the feedback switches from positive to negative and  $\text{Ca}^{2+}$  then inhibits the channel (Bezprozvanny and Ehrlich, 1995). This negative feedback effect ensures that just enough  $\text{Ca}^{2+}$  is released to give a meaningful signal, thus avoiding the cytoplasm from being swamped with this potentially cytotoxic agent.

The fact that  $\text{Ca}^{2+}$  release is regenerative has important implications for signalling because it provides one of the mechanisms for coordinating the activity of individual receptors, i.e. they can communicate with each other using  $\text{Ca}^{2+}$  as a messenger (Bootman and Berridge, 1995). A specific region within the cell usually functions as an initiation site in that it is the first to release  $\text{Ca}^{2+}$  which then diffuses outwards to excite neighbouring receptors, thereby setting up a  $\text{Ca}^{2+}$  wave. A global  $\text{Ca}^{2+}$  signal is created by coordinating release

from all the receptors using  $\text{Ca}^{2+}$  as the messenger. A more specialized mechanism of coordination is found in skeletal and cardiac muscle, where the opening of the RYRs is tightly coupled to the action potential sweeping over the plasma membrane (Cannell *et al.* 1995; Lopez-Lopez *et al.* 1995).

Using a regenerative process is inherently dangerous because it is liable to be triggered by the stochastic opening of a single channel. To avoid such random triggering of regenerative  $\text{Ca}^{2+}$  waves, cells have developed mechanisms for regulating the excitability of these intracellular receptors such that they are turned off in resting cells but become increasingly excitable when  $\text{Ca}^{2+}$  signals are being generated. In the case of the  $\text{InsP}_3\text{Rs}$ , excitability is regulated by the agonist-dependent generation of  $\text{InsP}_3$  by cell surface receptors. This  $\text{InsP}_3$  binds to the  $\text{InsP}_3\text{Rs}$ , greatly enhancing their sensitivity to the stimulatory action of  $\text{Ca}^{2+}$ . In effect, the  $\text{InsP}_3\text{R}$  is under the dual regulation of two agonists –  $\text{InsP}_3$  and  $\text{Ca}^{2+}$ . The primary function of the former is to increase the  $\text{Ca}^{2+}$  sensitivity of the  $\text{InsP}_3\text{R}$ . Similarly, the RYR may also be under dual regulation, at least in some cell types (Lee, 1994; Galione and White, 1994). The putative second messenger cyclic ADP ribose (cADPR) is able to enhance the  $\text{Ca}^{2+}$  sensitivity of the RYRs.

In summary, through the ability of  $\text{InsP}_3$  or cADPR to enhance the sensitivities of the  $\text{InsP}_3\text{Rs}$  and RYRs respectively, these messengers convert the quiescent cytoplasm into an excitable medium in which these intracellular channels can communicate with each other to generate global  $\text{Ca}^{2+}$  signals.

### Elementary events of $\text{Ca}^{2+}$ signalling

Recent advances in image analysis using confocal microscopy have enabled the operation of either single or small groups of these intracellular channels to be visualized (Bootman and Berridge, 1995). The brief opening of these channels gives rise to localized pulses (approximately  $2\ \mu\text{m}$  in diameter) such as the sparks in cardiac muscle (Cheng *et al.* 1993) or the blips and puffs in *Xenopus* oocytes (Yao *et al.* 1995; Parker and Yao, 1996). These elementary events of  $\text{Ca}^{2+}$  signalling have a characteristic time course: the concentration of  $\text{Ca}^{2+}$  builds up rapidly but once the channel closes, because of the negative feedback effect described earlier, the concentration falls more slowly as the  $\text{Ca}^{2+}$  gradually disperses by passive diffusion (Fig. 2).  $\text{Ca}^{2+}$  channels in the plasma membrane display similar elementary events such as the bumps in *Drosophila* receptors (Hardie, 1991) or the quantum emission domains (QEDs) in squid giant synapses (Sugimori *et al.* 1994). Attention is now focused on how these elementary events contribute to various aspects of  $\text{Ca}^{2+}$  signalling.

### Contribution to the resting level of $\text{Ca}^{2+}$

The spontaneous opening of  $\text{Ca}^{2+}$  channels has been observed in resting cells and this input of  $\text{Ca}^{2+}$  can contribute to the resting level of  $\text{Ca}^{2+}$ . In smooth muscle cells, the RYRs

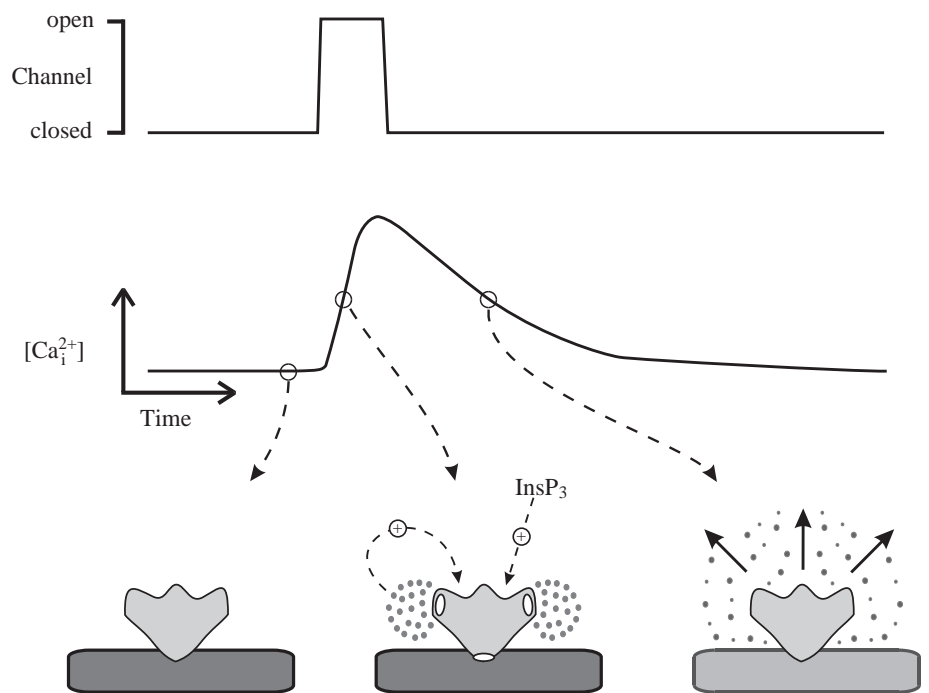

Fig. 2. Elementary event of  $\text{Ca}^{2+}$  signalling. The figure illustrates how the transient opening of an inositol 1,4,5-trisphosphate ( $\text{InsP}_3$ ) receptor on the endoplasmic reticulum gives rise to an elementary event that is characterized by a rapid rising phase facilitated by the positive feedback effect of  $\text{Ca}^{2+}$ . Once the channel closes, the slower recovery phase is due to the passive diffusion of  $\text{Ca}^{2+}$  away from the channel.

display elementary events referred to as sparks (Nelson *et al.* 1995). When these sparks occur close to the plasma membrane, they act on  $\text{Ca}^{2+}$ -sensitive  $\text{K}^+$  channels to produce a spontaneous transient outward current (STOC). The occurrence of STOCs in coronary smooth muscle was found to induce small fluctuations in the resting level of  $\text{Ca}^{2+}$  (Ganitkevich and Isenberg, 1996). Similarly, low levels of stimulation can increase the frequency of these elementary events, resulting in an increase in the resting level of  $\text{Ca}^{2+}$  as has been described in *Xenopus* oocytes (Parker and Yao, 1996) and in HeLa cells (Bootman and Berridge, 1996).

#### Localized action of elementary events

Evidence is beginning to emerge that elementary events might be capable of exerting a highly localized signalling function in addition to their role in contributing to the global elevation of  $\text{Ca}^{2+}$  levels described in the next section. An interesting case concerns the smooth muscle STOCs which can cause relaxation through membrane hyperpolarization (Nelson *et al.* 1995). What is remarkable, therefore, is that the same messenger  $\text{Ca}^{2+}$  is able to control both contraction and relaxation. This ability of  $\text{Ca}^{2+}$  to mediate opposing responses can be explained by the spatial organization of the  $\text{Ca}^{2+}$  signalling system. Localized high-concentration pulses of  $\text{Ca}^{2+}$  near the membrane cause relaxation, whereas contraction results from the global elevation of  $[\text{Ca}^{2+}]$  that occurs when a large proportion of the channels release  $\text{Ca}^{2+}$  synchronously using one of the mechanisms described below.

#### Global $\text{Ca}^{2+}$ signalling

The primary role of elementary events is to contribute to the

global  $\text{Ca}^{2+}$  signals responsible for controlling the diverse range of cellular processes described earlier (Bootman and Berridge, 1995). Such global responses depend upon the temporal coordination of a sufficient number of these elementary events so that their individual contributions will sum to give an increase in the cytosolic level of  $\text{Ca}^{2+}$ . As mentioned earlier, cells have evolved two main coordinating mechanisms. First, the opening of RYRs in various muscle cells is synchronized by being tightly coupled to the action potential in the plasma membrane. Second, synchronization is achieved by the channels communicating with each other using  $\text{Ca}^{2+}$  as a coupling factor. These two mechanisms will be illustrated by describing some specific examples. The evoked release of  $\text{Ca}^{2+}$  in muscle depends upon the dihydropyridine receptor (DHPR) in the plasma membrane functioning as a voltage sensor which detects the depolarization and then transfers the information to the underlying RYRs. In skeletal muscle, the DHPRs are directly coupled to the RYR1s, and information is transferred by a process of conformational coupling (Tsugorka *et al.* 1995; Klein *et al.* 1996). The DHPR responds to membrane depolarization by undergoing a change in conformation which is transmitted to the RYR1, inducing the latter to gate  $\text{Ca}^{2+}$ . Through this tight coupling, the action potential is capable of a near simultaneous recruitment of all the RYR1s to give the explosive release of  $\text{Ca}^{2+}$  responsible for the contraction of skeletal muscle.

Since the DHPRs do not associate directly with the RYR2s in cardiac cells, coupling is achieved using  $\text{Ca}^{2+}$  as an intermediary. The action potential opens the DHPRs which gate a small pulse of  $\text{Ca}^{2+}$  that is then greatly amplified as it stimulates a small group of RYR2s (Cannell *et al.* 1995; Lopez-Lopez *et al.* 1995). This coupling unit consisting of one DHPR plus approximately four RYR2s represents an autonomous

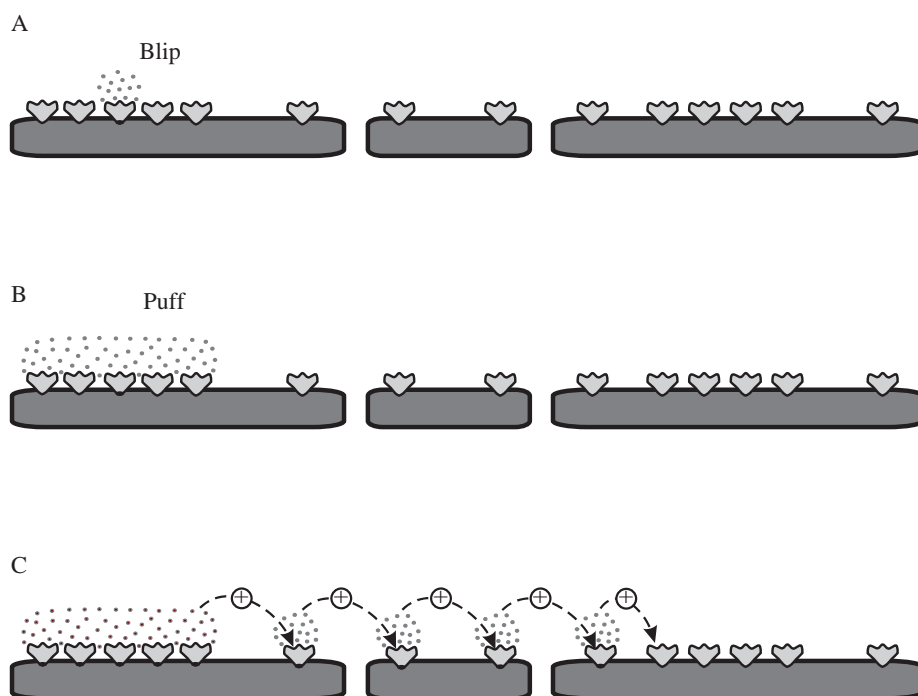

Fig. 3. Elementary and global events of  $\text{Ca}^{2+}$  signalling as exemplified in *Xenopus* oocytes. (A) At low  $\text{InsP}_3$  concentrations, a few receptors release  $\text{Ca}^{2+}$  as elementary events referred to as blips (see Fig. 2). (B) At intermediate  $\text{InsP}_3$  concentrations, groups of  $\text{InsP}_3$  receptors release  $\text{Ca}^{2+}$  to form puffs which fail to spread because neighbouring receptors are less excitable. (C) At high concentrations of  $\text{InsP}_3$ , all the receptors are excitable and puffs then act as initiation sites to spawn a regenerative wave that spreads through the process of  $\text{Ca}^{2+}$ -induced  $\text{Ca}^{2+}$  release.

elementary event of cardiac  $\text{Ca}^{2+}$  signalling.  $\text{Ca}^{2+}$  imaging has revealed that these units can fire spontaneously and independently of each other to produce sparks which fail to activate neighbouring units because of their low  $\text{Ca}^{2+}$  sensitivities (Cheng *et al.* 1993; Lopez-Lopez *et al.* 1995; Cannell *et al.* 1995). The fact that these elementary events can function independently of each other explains the long-standing paradox that  $\text{Ca}^{2+}$  release in cardiac cells can be graded with membrane potential. For each unit, the process of CICR operates between the DHPRs and the RYR2s, whereas the latter do not communicate with each other. However, the RYRs in the separate units can begin to communicate with each other when the cardiac cell becomes overloaded with  $\text{Ca}^{2+}$  as a consequence of an increase in the sensitivity of the RYR2s. In effect, this  $\text{Ca}^{2+}$  overload converts the cytoplasm into an excitable medium such that a  $\text{Ca}^{2+}$  spark can ignite neighbouring units, thereby setting up a regenerative  $\text{Ca}^{2+}$  wave (Cheng *et al.* 1993). Although these  $\text{Ca}^{2+}$  waves in overloaded cardiac cells are somewhat abnormal and can result in cardiac arrhythmias, they represent the synchronization mechanism used normally by most other cells as described below.

A characteristic feature of the  $\text{Ca}^{2+}$  signal in many non-muscle cells is that it is often organized as a wave similar to that observed in overloaded cardiac cells. There appear to be pre-determined areas which act as initiation sites where the signal first appears before spreading through the cell as a wave. This behaviour has been well-characterized in *Xenopus* oocytes responding to increasing concentrations of  $\text{InsP}_3$  (Fig. 3) (Yao *et al.* 1995; Parker and Yao, 1996). At very low  $\text{InsP}_3$  concentrations, there is a gradual increase in the resting level of  $\text{Ca}^{2+}$  which seems to result from the random openings of individual  $\text{InsP}_3$  receptors to give brief pulses of  $\text{Ca}^{2+}$  called

blips (Parker and Yao, 1996). As described earlier, the appearance of these elementary events represents the first indication of an increase in excitability and is associated with an increase in the resting level of  $\text{Ca}^{2+}$  (Parker and Yao, 1996; Bootman and Berridge, 1996). With further increases in stimulation, the blips in *Xenopus* oocytes grow into larger puffs which represent the initiation sites for the onset of  $\text{Ca}^{2+}$  waves (Fig. 3B). Such waves represent the mechanism of coordinating the release of  $\text{Ca}^{2+}$  by all the  $\text{InsP}_3$  receptors. If the latter are sufficiently sensitized, they will respond to the  $\text{Ca}^{2+}$  diffusing away from a puff site and thereby propagate the signal through a process of CICR (Fig. 3C).

### Conclusion

Cells maintain a rigid control over the intracellular level of  $\text{Ca}^{2+}$ , thus ensuring that the level is kept low during periods of inactivity. In order to use  $\text{Ca}^{2+}$  as a messenger, cells overcome this tight homeostatic control by using sophisticated mechanisms to release  $\text{Ca}^{2+}$  in brief bursts using either  $\text{InsP}_3$  or ryanodine receptors. These receptors display a unique autocatalytic process of  $\text{Ca}^{2+}$ -induced  $\text{Ca}^{2+}$  release (CICR) which overwhelms the normal homeostatic mechanisms by producing an explosive release of  $\text{Ca}^{2+}$  to give a brief pulse of  $\text{Ca}^{2+}$  often organized as a wave that sweeps through the cytoplasm. Such waves may occur repetitively, thus establishing an oscillation whose frequency is sensitive to agonist concentration. There is reason to believe, therefore, that  $\text{Ca}^{2+}$  signalling might be frequency-modulated. By encoding information in the form of brief all-or-none spikes, the cell can use  $\text{Ca}^{2+}$  as a messenger while retaining a tight control over  $\text{Ca}^{2+}$  homeostasis.

## References

- BENNETT, D. L., CHEEK, T. R., BERRIDGE, M. J., DE SMEDT, H., PARYS, J. B., MISSIAEN, L. AND BOOTMAN, M. D. (1996). Expression and function of ryanodine receptors in non-excitabile cells. *J. Biol. Chem.* **11**, 6356–6362.
- BERRIDGE, M. J. (1993). Inositol trisphosphate and  $\text{Ca}^{2+}$  signalling. *Nature* **361**, 315–325.
- BEZPROZVANNY, I. AND EHRLICH, B. E. (1995). The inositol 1,4,5-trisphosphate ( $\text{InsP}_3$ ) receptor. *J. Membr. Biol.* **145**, 205–216.
- BOOTMAN, M. D. AND BERRIDGE, M. J. (1995). The elemental principles of  $\text{Ca}^{2+}$  signaling. *Cell* **83**, 675–678.
- BOOTMAN, M. D. AND BERRIDGE, M. J. (1996). Sub-cellular  $\text{Ca}^{2+}$  signals underlying waves and graded responses in HeLa cells. *Curr. Biol.* **6**, 855–865.
- CANNELL, M. B., CHENG, H. AND LEDERER, W. J. (1995). The control of  $\text{Ca}^{2+}$  release in heart muscle. *Science* **268**, 1045–1049.
- CARAFOLI, E. (1994). The signaling function of  $\text{Ca}^{2+}$  and its regulation. *J. Hyperten.* **12** (Suppl. 10), S47–S56.
- CHEEK, T. R. (1991).  $\text{Ca}^{2+}$  regulation and homeostasis. *Curr. Opin. Cell Biol.* **3**, 199–205.
- CHENG, H., LEDERER, W. J. AND CANNELL, M. B. (1993).  $\text{Ca}^{2+}$  sparks – elementary events underlying excitation–contraction coupling in heart-muscle. *Science* **262**, 740–744.
- CLAPHAM, D. E. (1995).  $\text{Ca}^{2+}$  signaling. *Cell* **80**, 259–268.
- FURUICHI, T. AND MIKOSHIBA, K. (1995). Inositol 1,4,5-trisphosphate receptor-mediated  $\text{Ca}^{2+}$  signaling in the brain. *J. Neurochem.* **64**, 953–960.
- GALIONE, A. AND WHITE, A. (1994).  $\text{Ca}^{2+}$  release induced by cyclic ADP-ribose. *Trends Cell Biol.* **4**, 431–436.
- GANITKEVICH, V. Y. AND ISENBERG, G. (1996). Dissociation of subsarcolemmal from global cytosolic  $[\text{Ca}^{2+}]$  in myocytes from guinea-pig coronary artery. *J. Physiol., Lond.* **490**, 305–318.
- GIANNINI, G., CONTI, A., MAMMARELLA, S., SCROBOGNA, M. AND SORRENTINO, V. (1995). The ryanodine receptor/ $\text{Ca}^{2+}$  channel genes are widely and differentially expressed in murine brain and peripheral tissues. *J. Cell Biol.* **128**, 893–904.
- HARDIE, R. C. (1991). Whole-cell recordings of the light induced current in dissociated *Drosophila* photoreceptors: evidence for feedback by  $\text{Ca}^{2+}$  permeating the light-sensitive channels. *Proc. R. Soc. Lond. B* **245**, 203–210.
- KLEIN, M. G., CHENG, H., SANTANA, L. F., JIANG, Y. H., LEDERER, W. J. AND SCHNEIDER, M. F. (1996). Two mechanisms of quantized  $\text{Ca}^{2+}$ -release in skeletal-muscle. *Nature* **379**, 455–458.
- LEE, H. C. (1994). Cyclic ADP-ribose – a new member of a super family of signaling cyclic-nucleotides. *Cell Signall.* **6**, 591–600.
- LOPEZ-LOPEZ, J. R., SHACKLOCK, P. S., BALKE, C. W. AND WIER, W. G. (1995). Local  $\text{Ca}^{2+}$  transients triggered by single L-type  $\text{Ca}^{2+}$  channel currents in cardiac cells. *Science* **268**, 1042–1045.
- NELSON, M. T., CHENG, H., RUBART, M., SANTANA, L. F., BONEV, A. D., KNOT, H. J. AND LEDERER, W. J. (1995). Relaxation of arterial smooth muscle by  $\text{Ca}^{2+}$  sparks. *Science* **270**, 633–637.
- PARKER, I. AND YAO, Y. (1996).  $\text{Ca}^{2+}$  transients associated with openings of inositol trisphosphate-gated channels in *Xenopus* oocytes. *J. Physiol., Lond.* **491**, 663–668.
- SUGIMORI, M., LANG, E. J., SILVER, R. B. AND LLINAS, R. (1994). High-resolution measurement of the time-course of  $\text{Ca}^{2+}$ -concentration microdomains at squid presynaptic terminals. *Biol. Bull. mar. biol. Lab., Woods Hole* **187**, 300–303.
- TAYLOR, C. W. AND TRAYNOR, D. (1995).  $\text{Ca}^{2+}$  and inositol trisphosphate receptors. *J. Membr. Biol.* **145**, 109–118.
- TRUMP, B. J. AND BEREZESKY, I. K. (1995).  $\text{Ca}^{2+}$ -mediated cell injury and cell-death. *FASEB J.* **9**, 219–228.
- TSUGORKA, A., RIOS, E. AND BLATTER, L. A. (1995). Imaging elementary events of  $\text{Ca}^{2+}$ -release in skeletal-muscle cells. *Science* **269**, 1723–1726.
- YAO, Y., CHOI, J. AND PARKER, I. (1995). Quantal puffs of intracellular  $\text{Ca}^{2+}$  evoked by inositol trisphosphate in *Xenopus* oocytes. *J. Physiol., Lond.* **482**, 533–553.
